# Supplementary material for: Sulfatinib, a novel multi-targeted tyrosine kinase inhibitor of FGFR1, CSF1R, and VEGFR1–3, suppresses osteosarcoma proliferation and invasion via dual role in tumor cells and tumor microenvironment
Source: Frontiers journal article supplement (doi:10.3389/fonc.2023.1158857), 2023-06-08
Supplement: Data_Sheet_1.pdf [file Data_Sheet_1.pdf]

***Supplementary Material***

**Sulfatinib, a novel multi-targeted tyrosine kinase inhibitor of  
FGFR1, CSF1R, VEGFR1-3, suppresses osteosarcoma  
proliferation and invasion via dual role in tumor cells and  
tumor microenvironment**

**Liao Song, Li Jianxiong, Gao Song, Han Yuchen, Han Xinli, Wu Yanan, Bi  
Jingyou, Xu Meng\*, Bi Wenzhi\***

Liao Song and Li Jianxiong contributed equally to this work.

**\*Correspondence:** Bi Wenzhi: [Biwenzhi@sina.com](mailto:Biwenzhi@sina.com);  
Xu Meng: [13501175839@163.com](mailto:13501175839@163.com)

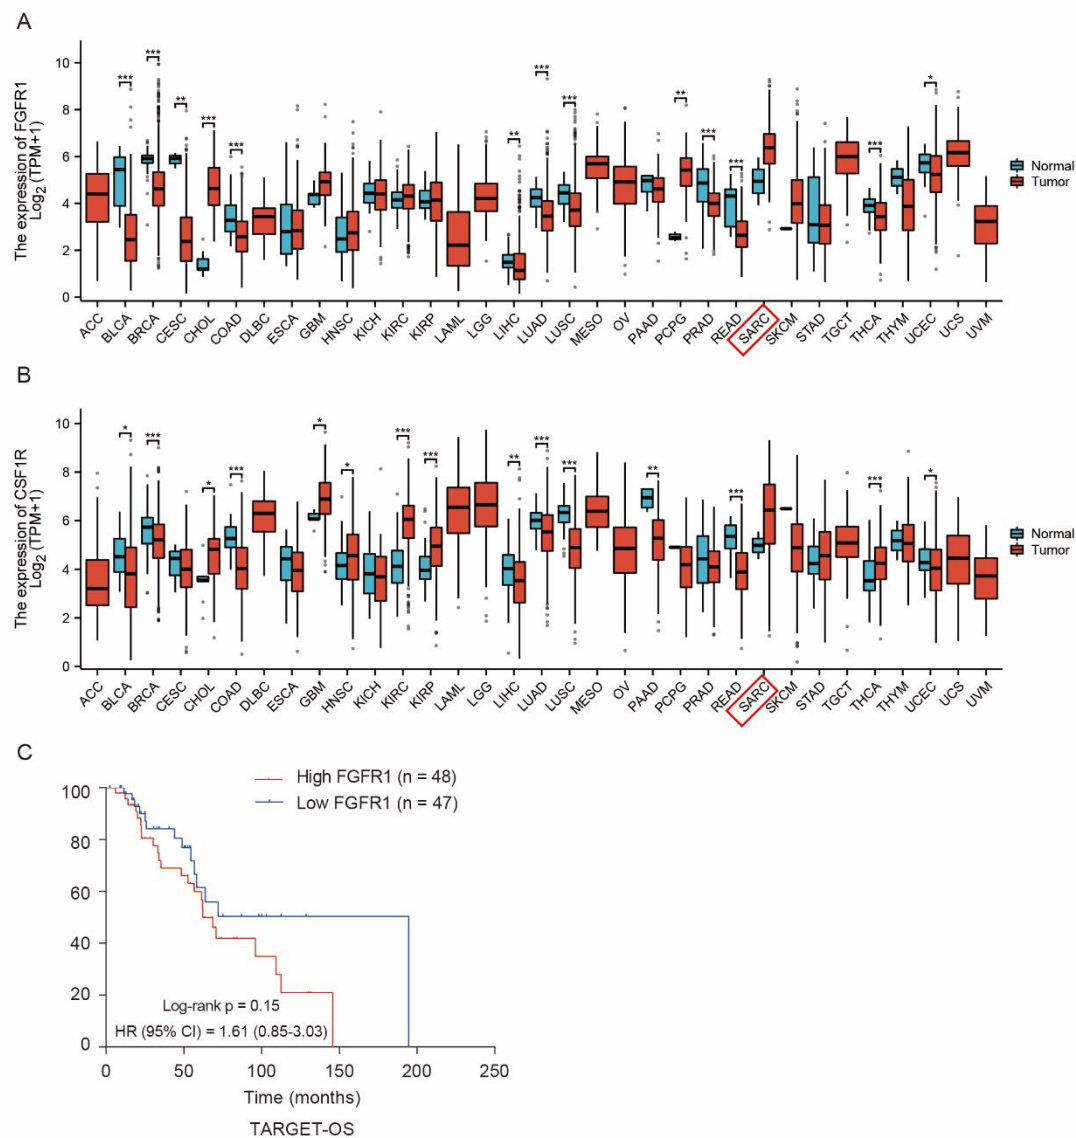

**Supplemental Figure 1 FGFR1 and CSF1R expression are increased in sarcoma.**

**A.** FGFR1 expression is increase in sarcoma from analysis of TCGA data.

**B.** CSF1R expression is increase in sarcoma from analysis of TCGA data.

**C.** Survival analysis of TARGET data indicates the high expression of FGFR1 correlate with poor prognosis in OS patients.

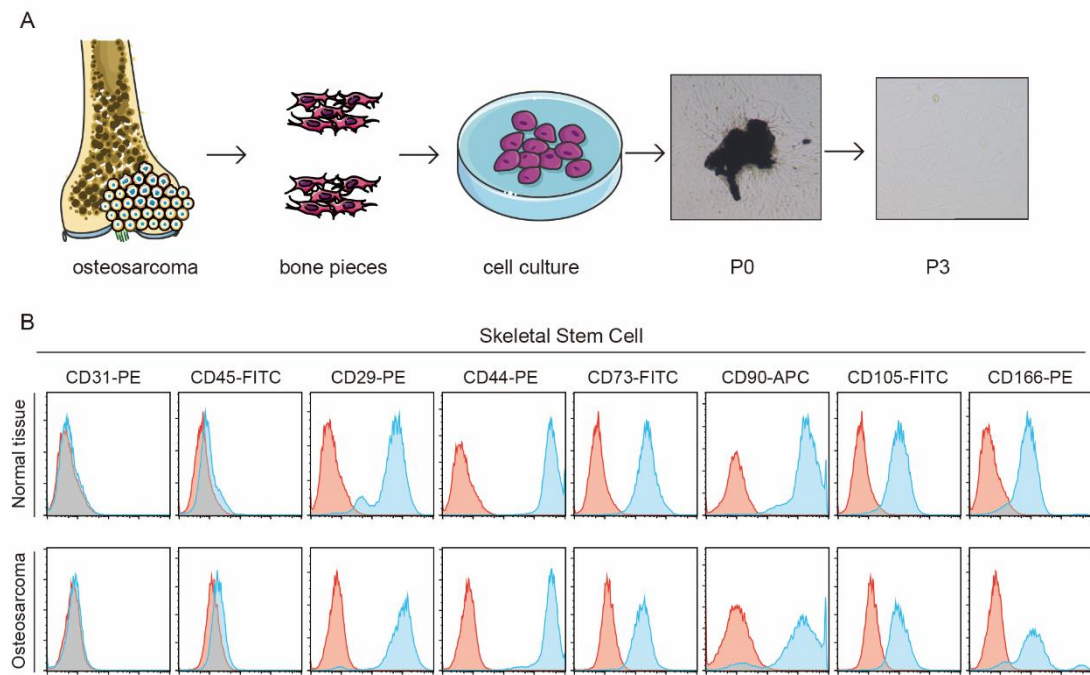

**Supplemental Figure 2 Isolation and identification of skeletal stem cell.**

**A.** A schematic workflow of skeletal stem cells (SSCs) isolation.

**B.** SSCs isolated from the tumor tissue and adjacent normal bone have the same stem cell markers.

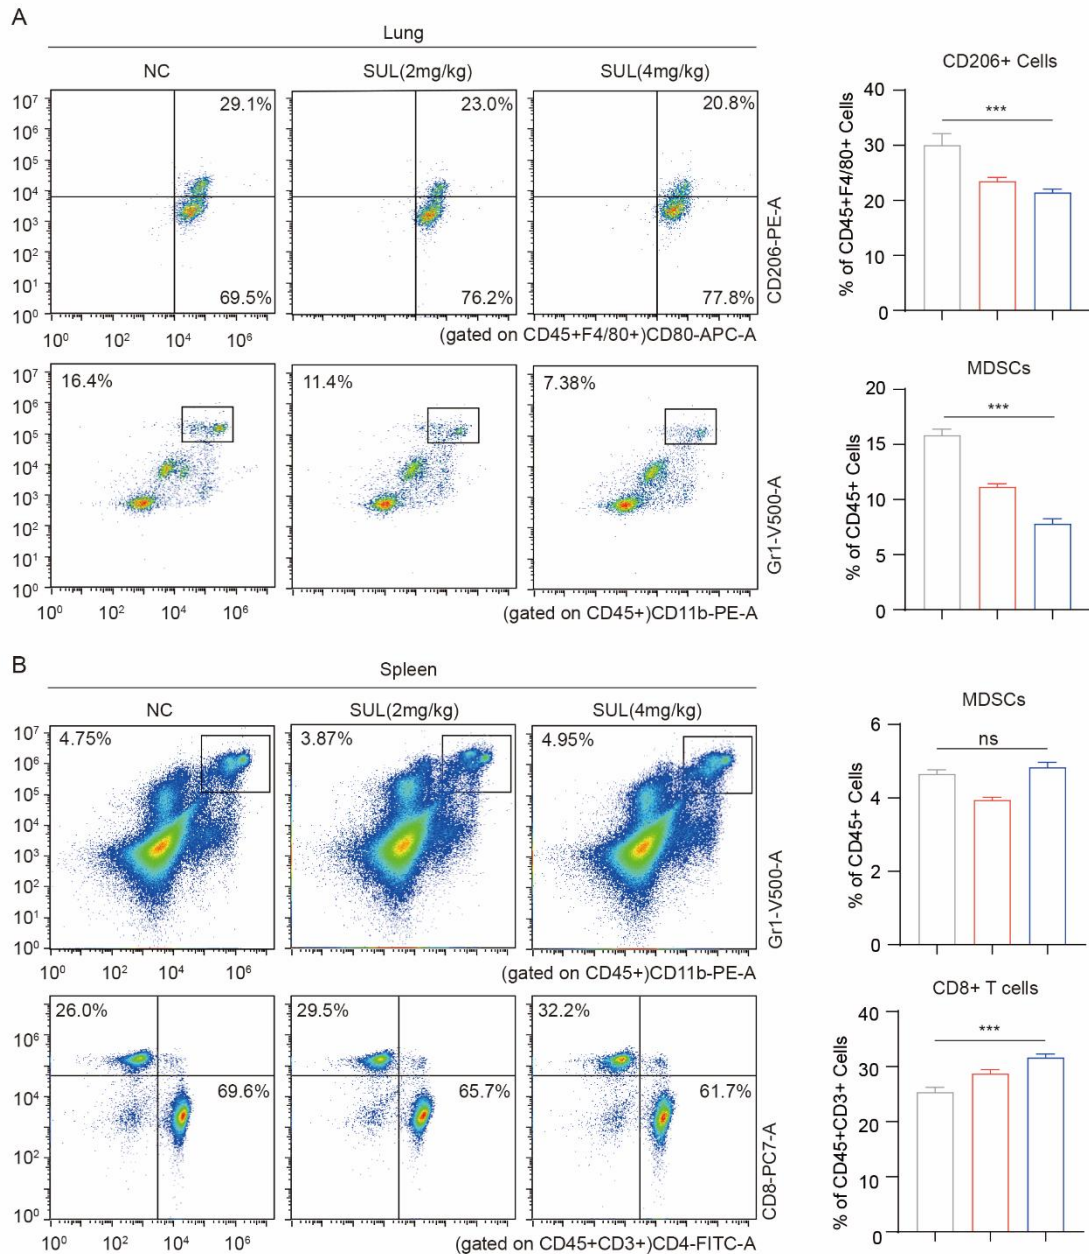

**Supplemental Figure 3 Proportion of immune cells in lung and spleen after treatment with sulfatinib.**

**A.** Flow cytometry analysis of M2 macrophages and MDSCs isolated from lung tissues by ex vivo dissociation.

**B.** Flow cytometry analysis of MDSCs and CD4/8 T cells isolated from spleen tissues by ex vivo dissociation.
